# Supplementary material
Source: PubMed Central journal article supplement (PMC7747353)
Supplement: 40820_2017_164_MOESM1_ESM.pdf [file 40820_2017_164_MOESM1_ESM.pdf]

Supporting Information for

## Microwave Assisted Synthesis of NiCo<sub>2</sub>O<sub>4</sub> Double-Shelled Hollow Spheres for High Performance Sodium Ion Batteries

Xiong Zhang<sup>1</sup>, Yanping Zhou<sup>2, \*</sup>, Bin Luo<sup>2</sup>, Huacheng Zhu<sup>2</sup>, Wei Chu<sup>1, \*</sup>, Kama Huang<sup>2</sup>

<sup>1</sup>School of Chemical Engineering, Sichuan University, Chengdu 610065, People's Republic of China

<sup>2</sup>School of Electronics and Information Engineering, Sichuan University, Chengdu 610065, People's Republic of China

\* Corresponding authors. Email: ypzhou11@scu.edu.cn; chuwei1965@scu.edu.cn

### Figures and Table

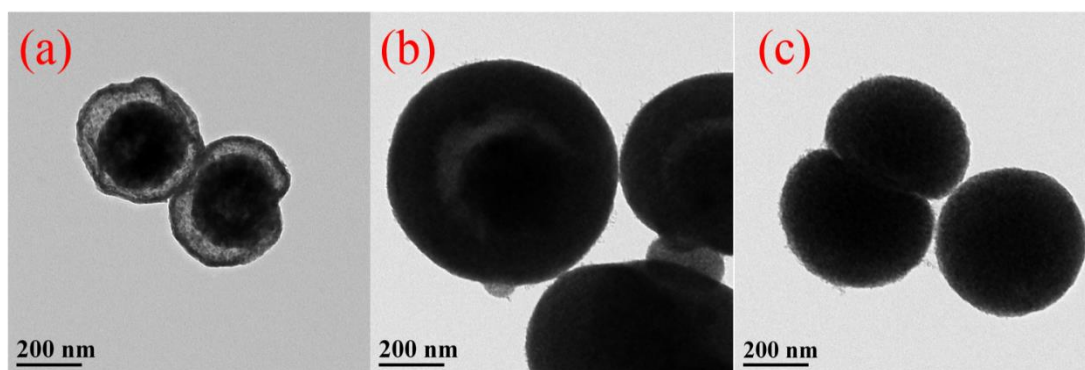

**Fig. S1** The TEM images of NiCo<sub>2</sub>O<sub>4</sub> obtained at different heating rates **a** 1 °C min<sup>-1</sup>, **b** 5 °C min<sup>-1</sup>, and **c** 10 °C min<sup>-1</sup>

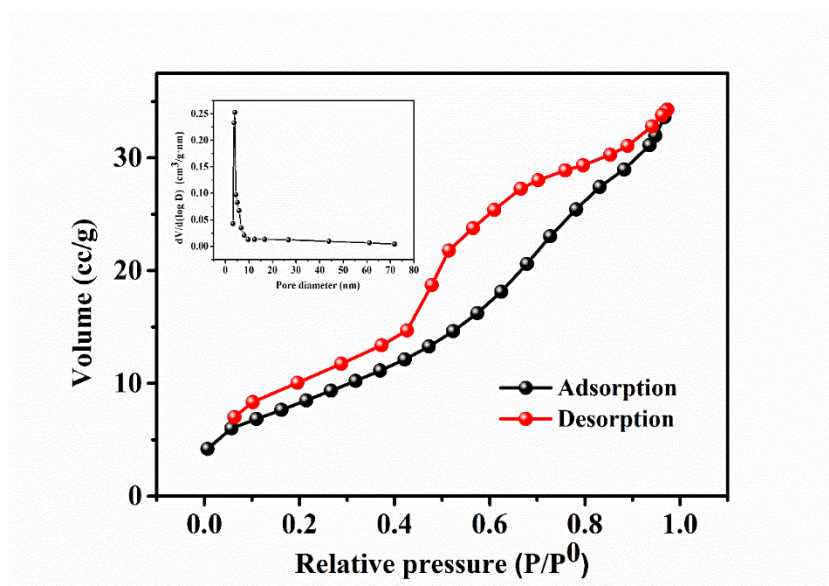

**Fig. S2** N<sub>2</sub> adsorption/desorption isotherm and the corresponding pore size distribution curves (insets) of the as-synthesized NiCo<sub>2</sub>O<sub>4</sub> double-shelled hollow spheres

**Table S1** Sodium storage performance of different NiCo<sub>2</sub>O<sub>4</sub> electrodes

| Type of material                                      | Capacity<br>(mAh g <sup>-1</sup> )    | Rate capacity<br>(mAh g <sup>-1</sup> ) | Cycling stability<br>(mAh g <sup>-1</sup> )           | Reference |
|-------------------------------------------------------|---------------------------------------|-----------------------------------------|-------------------------------------------------------|-----------|
| NiCo <sub>2</sub> O <sub>4</sub> double hollow sphere | 814<br>(at 100 mA g <sup>-1</sup> )   | 251<br>(at 1000 mA g <sup>-1</sup> )    | 341<br>(After 100 cycles at 100 mA g <sup>-1</sup> )  | This work |
| NiCo <sub>2</sub> O <sub>4</sub> hollow nanoboxs      | 826<br>(at 50 mA g <sup>-1</sup> )    | ----                                    | 328<br>(After 30 cycles at 50 mA g <sup>-1</sup> )    | Ref. [7]  |
| ----                                                  | 618<br>(at 0.1 C)                     | ----                                    | 200<br>(After 3 cycles at 0.1 C)                      | Ref. [24] |
| NiCo <sub>2</sub> O <sub>4</sub> nanosheet            | 690.4<br>(at 100 mA g <sup>-1</sup> ) | 141.8<br>(at 1000 mA g <sup>-1</sup> )  | 203.7<br>(After 50 cycles at 200 mA g <sup>-1</sup> ) | Ref. [25] |
| NiCo <sub>2</sub> O <sub>4</sub> microrods            | 431.1<br>(at 100 mA g <sup>-1</sup> ) | 130.8<br>(at 1000 mA g <sup>-1</sup> )  | ----                                                  | Ref. [26] |
